# Supplementary material for: The Impact of Rearing Salinity on Flesh Texture, Taste, and Fatty Acid Composition in Largemouth Bass Micropterus salmoides
Source: MDPI journal article supplement (doi:10.3390/foods11203261), 2022-10-19
Supplement: s1 [file s1]

**Table S1.** Detect limit of fatty acids in the present study.

| Fatty acids | Detect limit (mg/Kg) | Fi     | Fj     |
|-------------|----------------------|--------|--------|
| C8:0        | 0.5                  | 0.9114 | 0.9192 |
| C10:0       | 0.5                  | 0.9247 | 0.9314 |
| C11:0       | 0.5                  | 0.9300 | 0.9363 |
| C12:0       | 0.5                  | 0.9346 | 0.9405 |
| C13:0       | 0.5                  | 0.9386 | 0.9442 |
| C14:0       | 0.5                  | 0.9421 | 0.9473 |
| C14:1n5     | 0.5                  | 0.9417 | 0.9470 |
| C15:0       | 0.5                  | 0.9453 | 0.9502 |
| C15:1n5     | 0.5                  | 0.9449 | 0.9499 |
| C16:0       | 0.5                  | 0.9481 | 0.9529 |
| C16: 1n7    | 0.5                  | 0.9477 | 0.9525 |
| C17:0       | 0.5                  | 0.9507 | 0.9552 |
| C17:1n7     | 0.5                  | 0.9503 | 0.9549 |
| C18:0       | 0.5                  | 0.9530 | 0.9573 |
| C18: 1n9t   | 0.5                  | 0.9527 | 0.9570 |
| C18: 1n9c   | 0.5                  | 0.9527 | 0.9571 |
| C18: 2n6t   | 0.5                  | 0.9524 | 0.9568 |
| C18: 2n6c   | 0.5                  | 0.9524 | 0.9568 |
| C20:0       | 0.5                  | 0.9570 | 0.9609 |
| C18:3n6     | 0.5                  | 0.9520 | 0.9559 |
| C20:1       | 0.5                  | 0.9568 | 0.9608 |
| C18:3n3     | 0.5                  | 0.9520 | 0.9560 |
| C21:0       | 0.5                  | 0.9588 | 0.9628 |
| C20:2       | 0.5                  | 0.9565 | 0.9605 |
| C22:0       | 0.5                  | 0.9604 | 0.9642 |
| C20:3n6     | 0.5                  | 0.9562 | 0.9598 |
| C22:1n9     | 0.5                  | 0.9602 | 0.9639 |
| C20:3n3     | 0.5                  | 0.9562 | 0.9598 |
| C20:4n6     | 0.5                  | 0.9560 | 0.9597 |
| C23:0       | 0.5                  | 0.9620 | 0.9658 |
| C22:2n6     | 0.5                  | 0.9600 | 0.9638 |
| C24:0       | 0.5                  | 0.9963 | 1.0002 |
| C20:5n3     | 1.0                  | 0.9557 | 0.9592 |
| C24:1n9     | 1.0                  | 0.9632 | 0.9666 |
| C22:6n3     | 1.0                  | 0.9590 | 0.9624 |

Note: Fi represent conversion factor of fatty acid methyl ester to fatty acid, Fj represent conversion factor of fatty acid triglycerides to fatty acids.
